# Supplementary material for: Precipitation over southern Africa: is there consensus among global climate models (GCMs), regional climate models (RCMs) and observational data?
Source: Copernicus journal article supplement (doi:10.5194/gmd-15-3387-2022), 2022-04-22
Supplement: Supplementary file 1 [file gmd-15-3387-2022-supplement.pdf]

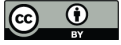

*Supplement of*

**Precipitation over southern Africa: is there consensus among global climate models (GCMs), regional climate models (RCMs) and observational data?**

**Maria Chara Karypidou et al.**

*Correspondence to:* Maria Chara Karypidou (karypidou@geo.auth.gr)

The copyright of individual parts of the supplement might differ from the article licence.

# Precipitation over southern Africa: Is there consensus among GCMs, RCMs and observational data?

Table S1: Observational datasets used.

| Dataset      | Resolution | Frequency     | Type        | Period       | Reference                                       |
|--------------|------------|---------------|-------------|--------------|-------------------------------------------------|
| ARC.v2       | 0.1°       | Daily total   | Satellite   | 1983-present | (Novella and Thiaw, 2013)                       |
| PERSIANN-CDR | 0.25°      | Daily total   | Satellite   | 1983-present | (Ashouri et al., 2015)                          |
| CMAP         | 2.5°       | Monthly mean  | Satellite   | 1979-present | (Xie and Arkin, 1997)                           |
| TAMSAT.v3    | 0.0375 °   | Daily total   | Satellite   | 1983-present | (Tarnavsky et al., 2014; Maidment et al., 2017) |
| GPCP.v2      | 2.5°       | Monthly mean  | Satellite   | 1979-2015    | (Adler et al., 2012)                            |
| CRU TS4.01   | 0.5°       | Monthly total | Gauge-Based | 1901-2016    | (Harris et al., 2014)                           |
| GPCC.v7      | 0.5°       | Monthly total | Gauge-Based | 1901-2013    | (Schneider et al., 2015)                        |
| PREC/L       | 0.5°       | Monthly mean  | Gauge-Based | 1948-2012    | (Chen et al., 2002)                             |
| UDEL.v4.01   | 0.5°       | Monthly total | Gauge-Based | 1900-2014    | (Willmott and Matsuura, 1995)                   |
| CPC-Unified  | 0.5°       | Daily total   | Gauge-Based | 1979-present | (Chen et al., 2008)                             |
| CHIRPS.v2    | 0.05°      | Daily total   | Satellite   | 1981-present | (Funk et al., 2015)                             |
| ERA5         | ~0.28125 ° | Hourly        | Reanalysis  | 1979-present | (C3S, 2017; Hersbach et al., 2020)              |

Table S2: General circulation models participating in the Coupled Model Intercomparison Project Phase 5 (CMIP5) that were used as forcing fields in the Coordinated Regional Climate Downscaling Experiment (CORDEX) – Africa historical simulations. Data for precipitation were retrieved from the Earth System Grid Federation (<https://esgf-data.dkrz.de/projects/esgf-dkrz/>). Data for temperature at 850 hPa were retrieved from the Climate Data Store (<https://cds.climate.copernicus.eu#!/home>).

| GCM           | Institute                                                                             | Ensemble          | Latitude Res. | Longitude Res. | References               |
|---------------|---------------------------------------------------------------------------------------|-------------------|---------------|----------------|--------------------------|
| CanESM2       | Canadian Centre for Climate Modelling and Analysis (CCCma)                            | r1i1p1            | 2.7906 °      | 2.8125 °       | (CCCma, 2017)            |
| CNRM-CM5      | Centre Europeen de Recherche et de Formation Avancee en Calcul Scientifique (CERFACS) | r1i1p1            | 1.40008 °     | 1.40625 °      | (Voltaire et al., 2013)  |
| CSIRO-Mk3-6-0 | Commonwealth Scientific and Industrial Research Organization (CSIRO)                  | r1i1p1            | 1.8653 °      | 1.875 °        | (Jeffrey et al., 2013)   |
| EC-EARTH      | Sveriges Meteorologiska och Hydrologiska Institut (SMHI),                             | r1i1p1<br>r12i1p1 | 1.1215 °      | 1.125 °        | (Hazeleger et al., 2010) |

|              |                                                        |        |            |           |                          |
|--------------|--------------------------------------------------------|--------|------------|-----------|--------------------------|
|              | Danmarks Meteorologiske Insitut (DMI)                  |        |            |           |                          |
| GFDL-ESM-2M  | National Oceanic and Atmospheric Administration (NOAA) | rli1p1 | 2.0225 °   | 2.5 °     | (Dunne et al., 2012)     |
| GFDL-ESM-2G  |                                                        |        |            |           |                          |
| HadGEM2-ES   | Met Office Hadley Centre                               | rli1p1 | 1.25 °     | 1.875 °   | (Collins et al., 2011)   |
| IPSL-CM5A-MR | Institut Pierre Simon Laplace (IPSL)                   | rli1p1 | 1.2676 °   | 2.5 °     | (Dufresne et al., 2013)  |
| IPSL-CM5A-LR |                                                        |        | 1.894737 ° | 3.75 °    |                          |
| MIROC5       | Atmospheric and Ocean Research Institute (AORI)        | rli1p1 | 1.4008 °   | 1.40625 ° | (Watanabe et al., 2010)  |
| MPI-ESM-LR   | Max Planck Institute for Meteorology (MPI)             | rli1p1 | 1.8653 °   | 1.875 °   | (Giorgetta et al., 2013) |
| NorESM1-M    | EarthClim                                              | rli1p1 | 1.894737 ° | 2.5 °     | (Bentsen et al., 2013)   |

11

12 Table S3: General circulation models participating in the Coupled Model Intercomparison Project Phase 6 (CMIP6).  
13 Data were retrieved from the Earth System Grid Federation (<https://esgf-data.dkrz.de/projects/esgf-dkrz/>). The CMIP6  
14 models used were selected in accordance to their predecesso CMIP5, so that the 2 ensembles (CMIP5 and CMIP6)  
15 would be comparable.

| GCM          | Institute                                                                                       | Ensemble | Latitude Res. | Longitude Res. | References               |
|--------------|-------------------------------------------------------------------------------------------------|----------|---------------|----------------|--------------------------|
| CanESM5      | Canadian Centre for Climate Modelling and Analysis (CCCma)                                      | rli1p1f1 | 2.8 °         | 2.8 °          | (Swart et al., 2019)     |
| CNRM-CM6-1   | Centre Europeen de Recherche et de Formation Avancee en Calcul Scientifique (CERFACS)           | rli1p1f2 | 1.4°          | 1.4 °          | (Voldoire et al., 2019)  |
| EC-EARTH3    | Sveriges Meteorologiska och Hydrologiska Institut (SMHI), Danmarks Meteorologiske Insitut (DMI) | rli1p1f1 | 0.7 °         | 0.7 °          | (Massonnet et al., 2020) |
| GFDL-ESM4    | National Oceanic and Atmospheric Administration (NOAA)                                          | rli1p1f1 | 1 °           | 1.3 °          | (Held et al., 2019)      |
| IPSL-CM6A-LR | Institut Pierre Simon Laplace (IPSL)                                                            | rli1p1f1 | 1.3 °         | 2.5 °          | -                        |

|              |                                                 |          |           |      |                          |
|--------------|-------------------------------------------------|----------|-----------|------|--------------------------|
| MIROC6       | Atmospheric and Ocean Research Institute (AORI) | rlilplfl | 1.4°      | 1.4° | (Tatebe et al., 2019)    |
| MPI-ESM-2-LR | Max Planck Institute for Meteorology (MPI)      | rlilplfl | 1.9°      | 1.9° | (Mauritsen et al., 2019) |
| NorESM2-LM   | EarthClim                                       | rlilplfl | 1.894737° | 2.5° | (Seland et al., 2020)    |

16

17 Table S4: Regional climate model simulations participating in the Coordinated Regional Climate Downscaling  
 18 Experiment (CORDEX) – Africa ensemble used in the current analysis, with a spatial resolution equal to 0.44°  
 19 (CORDEX0.44). Data were retrieved from the Earth System Grid Federation ([https://esgf-data.dkrz.de/projects/esgf-  
 20 dkrz/](https://esgf-data.dkrz.de/projects/esgf-dkrz/)).

| RCM           | Institute                                                          | Forcing                                                                                                                                       | Realization                                                                                                           | References                   |
|---------------|--------------------------------------------------------------------|-----------------------------------------------------------------------------------------------------------------------------------------------|-----------------------------------------------------------------------------------------------------------------------|------------------------------|
| CCLM4-8-17.v1 | Climate Limited-area Modelling Community (CLMcom)                  | CNRM-CM5<br>EC-EARTH<br>HadGEM2-ES<br>MPI-ESM-LR                                                                                              | rlilpl<br>r12ilpl<br>rlilpl<br>rlilpl                                                                                 | (COSMO, 2020)                |
| RACMO22T.v1   | Royal Netherlands Meteorological Institute (KNMI)                  | EC-EARTH<br>EC-EARTH<br>HadGEM2-ES                                                                                                            | rlilpl<br>r12ilpl<br>rlilpl                                                                                           | (van Meijgaard et al., 2008) |
| RCA4.v1       | Swedish Meteorological and Hydrological Institute (SHMI)           | CanESM2<br>CNRM-CM5<br>CSIRO-Mk3-6-0<br>EC-EARTH<br>EC-EARTH<br>IPSL-CM5A-MR<br>HadGEM2-ES<br>MPI-ESM-LR<br>NorESM1-M<br>GFDL-ESM2M<br>MIROC5 | rlilpl<br>rlilpl<br>rlilpl<br>r12ilpl<br>rlilpl<br>rlilpl<br>rlilpl<br>rlilpl<br>rlilpl<br>rlilpl<br>rlilpl<br>rlilpl | (Samuelsson et al., 2015)    |
| REMO2009.v1   | Max Planck Institut (MPI) and Climate Service Center Germany (CSC) | EC-EARTH<br>MPI-ESM-LR<br>IPSL-CM5A-MR<br>MIROC5<br>HadGEM2-ES<br>GFDL-ESM2G                                                                  | r12ilpl<br>rlilpl<br>r12ilpl<br>rlilpl<br>rlilpl<br>rlilpl                                                            | (Jacob et al., 2012)         |
| CRCM5.v1      | Canadian Centre for Climate Modelling and Analysis (CCCma)         | CanESM2<br>MPI-ESM-LR                                                                                                                         | rlilpl<br>rlilpl                                                                                                      | (Scinocca et al., 2015)      |

21 Table S5: Regional climate model simulations participating in the Coordinated Regional Climate Downscaling  
 22 Experiment (CORDEX) – Africa ensemble used in the current analysis, with a spatial resolution equal to 0.22°  
 23 (CORDEX0.22). Data were retrieved from the Earth System Grid Federation ([https://esgf-data.dkrz.de/projects/esgf-](https://esgf-data.dkrz.de/projects/esgf-dkrz/)  
 24 [dkrz/](https://esgf-data.dkrz.de/projects/esgf-dkrz/)).

| RCM                                | Forcing    | Realization                | Variables available                |
|------------------------------------|------------|----------------------------|------------------------------------|
| CanRCM4                            | CanESM2    | r1i1p1                     | Pr                                 |
| CCLM5-0-15<br>REMO2015<br>RegCM4-7 | HadGEM2-ES | r1i1p1<br>r1i1p1<br>r1i1p1 | Pr, hus850, ua850,<br>va850, ta850 |
| CCLM5-0-15<br>REMO2015<br>RegCM4-7 | MPI-ESM-LR | r1i1p1<br>r1i1p1<br>r1i1p1 | Pr, hus850, ua850,<br>va850, ta850 |
| CCLM5-0-15<br>REMO2015<br>RegCM4-7 | NorESM1-M  | r1i1p1<br>r1i1p1<br>r1i1p1 | Pr, hus850, ua850,<br>va850, ta850 |

25

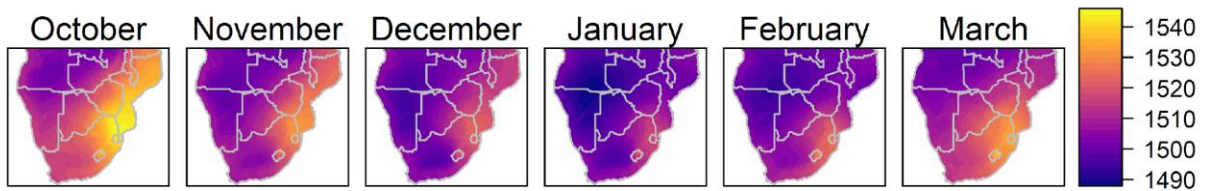

26

27 Figure S1: Mean monthly geopotential height at 850 hPa in ERA5 for the period 1986-2005.

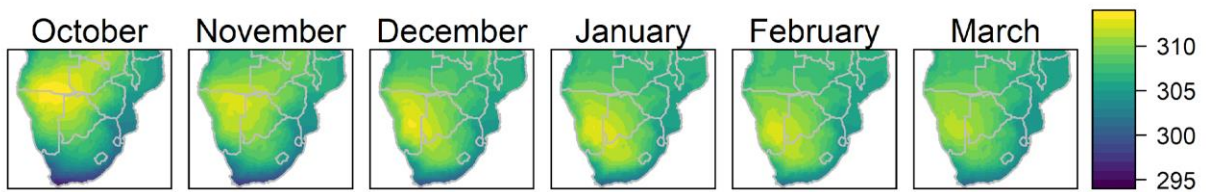

28

29 Figure S2: Mean monthly potential temperature at 850 hPa in ERA5 for the period 1986-2005.

30

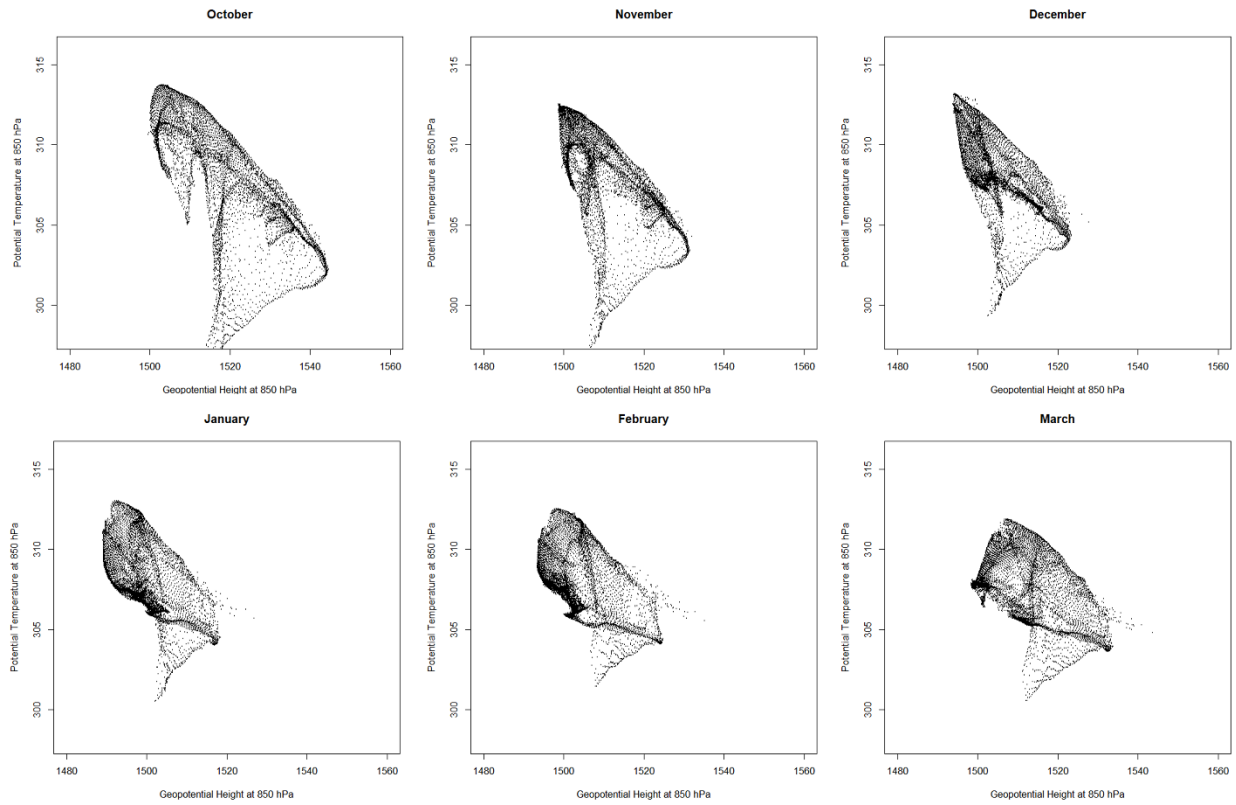

31

32 Figure S3: Geopotential height at 850 hPa (x-axis) plotted against potential temperature at 850 hPa (y-axis). Values  
 33 refer to climatological monthly means for the period 1986-2005. Each dot in the scatterplot represents a pixel of the  
 34 ERA5 dataset over the whole southern Africa region 10°E to 42°E and from 10°S to 35°S.

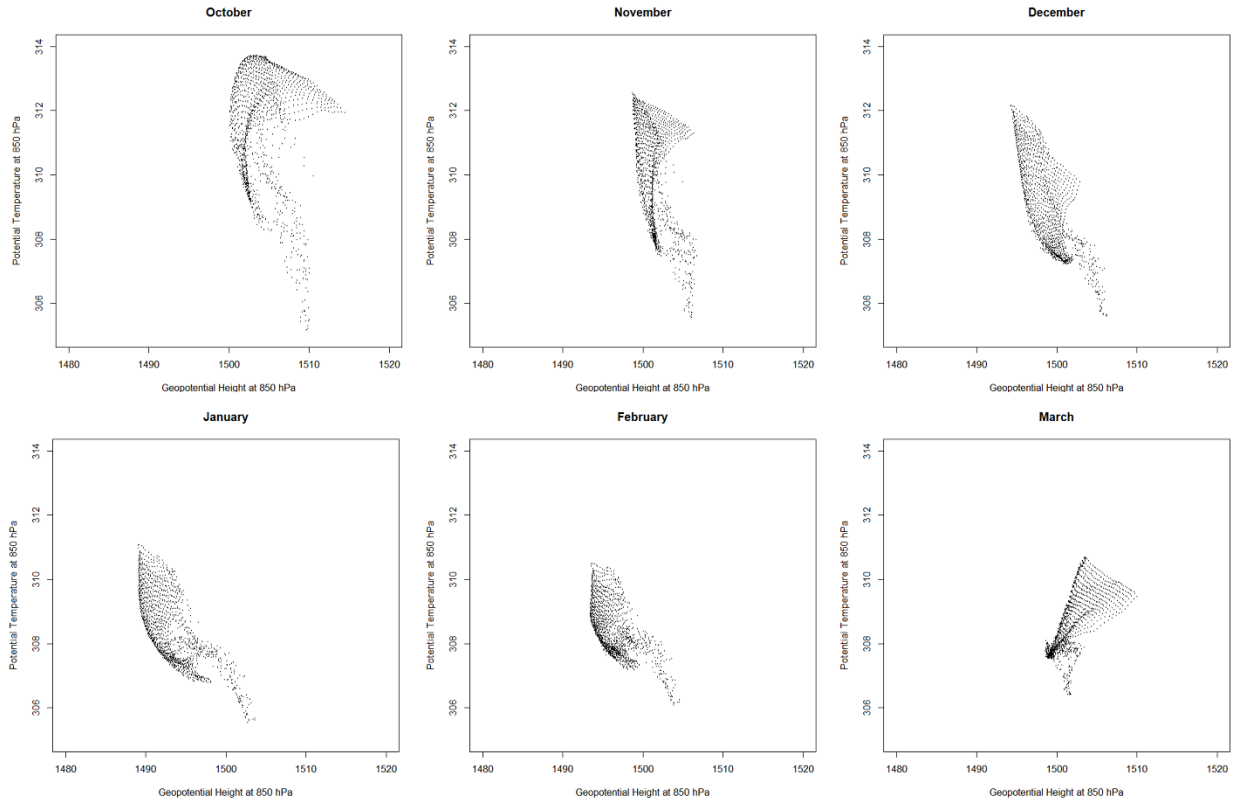

35

36 Figure S4: Geopotential height at 850 hPa (x-axis) plotted against potential temperature at 850 hPa (y-axis). Values  
 37 refer to climatological monthly means for the period 1986-2005. Each dot in the scatterplot represents a pixel of the  
 38 ERA5 dataset over the greater Angola region from 14°E to 25°E and from 11°S to 19°S.

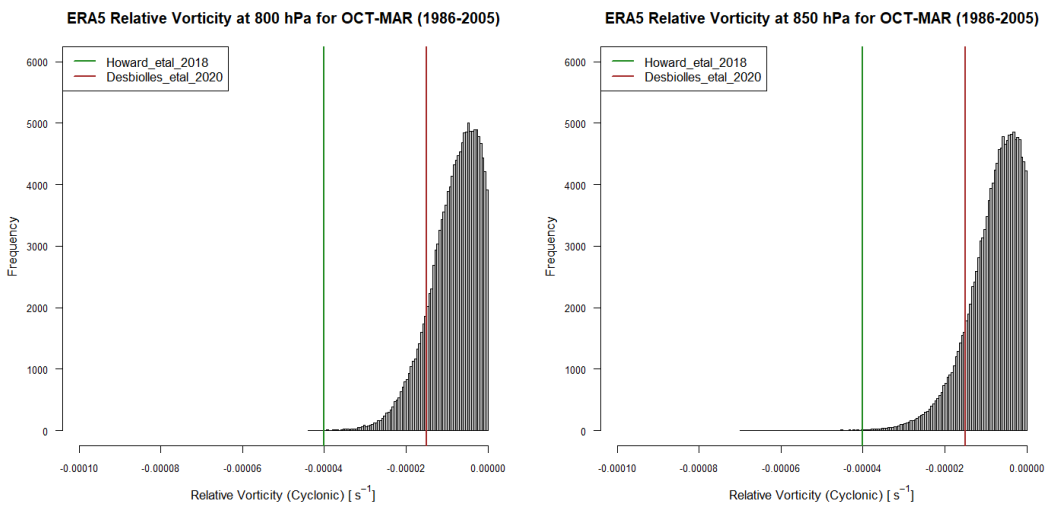

39

40 Figure S5: Histogram of relative vorticity for months Oct-Mar during 1986-2005 in ERA5 using u and v values at 800  
 41 hPa (left) and at 850 hPa (right). Pixels used are enclosed by the region from 14°E to 25°E and from 11°S to 19°S.  
 42 For both histograms mean monthly u and v values are used.

43

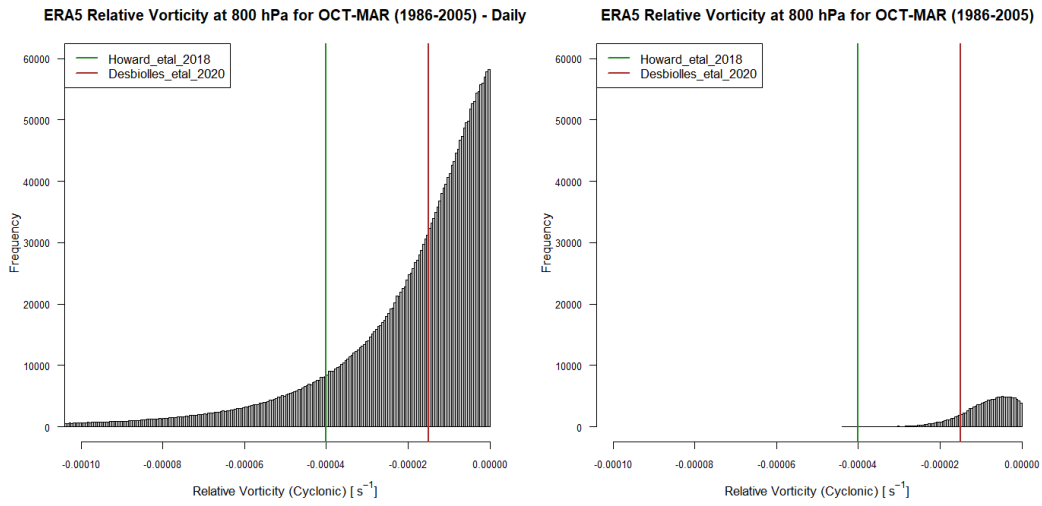

44

45 Figure S6: Histogram of relative vorticity for months Oct-Mar during 1986-2005 in ERA5 using daily u and v values  
 46 (left) and using monthly u and v values (right). Pixels used are enclosed by the region from 14 °E to 25 °E and from  
 47 11 °S to 19 °S.

48

49

50

51

52

53

54

55

56



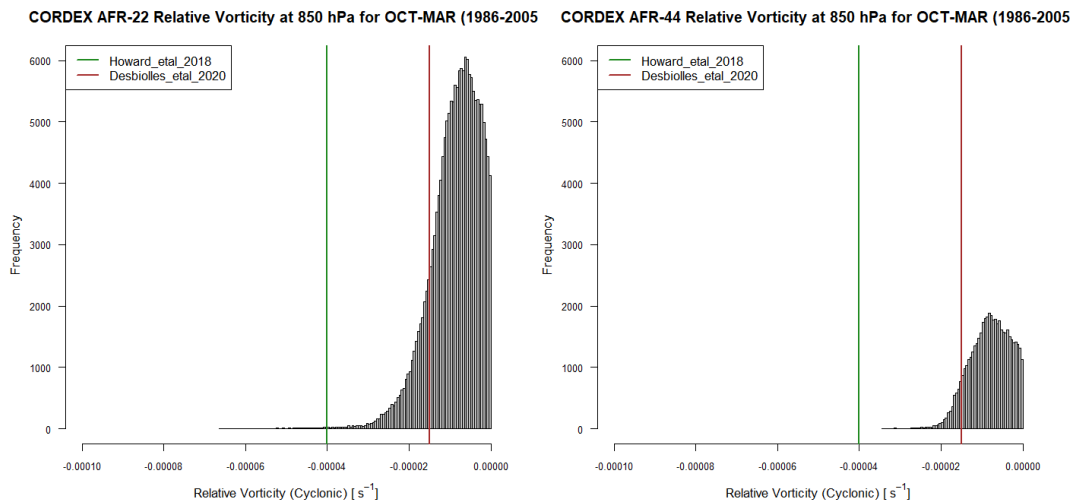

57

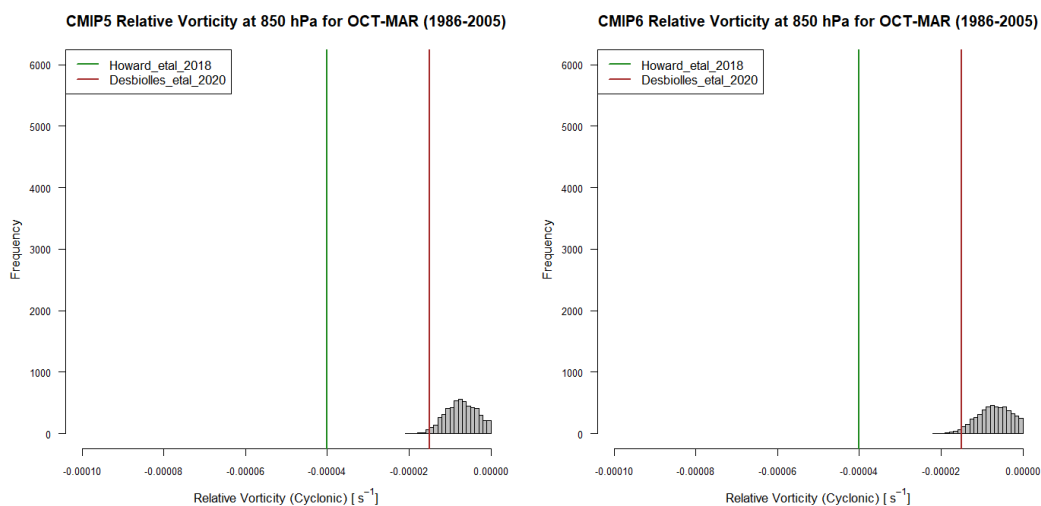

58

59 Figure S7: Histogram of relative vorticity for months Oct-Mar during 1986-2005 at 850 hPa for CORDEX-Africa at  
 60 0.22° (upper left), for CORDEX-Africa 0.44° (upper right), for CMIP5 (lower left), and for CMIP6 (lower right).  
 61 Pixels used are enclosed by the region from 14 °E to 25 °E and from 11 °S to 19 °S. For all histograms mean monthly  
 62 u and v values are used.

63

64

65

66

67

68

69

70

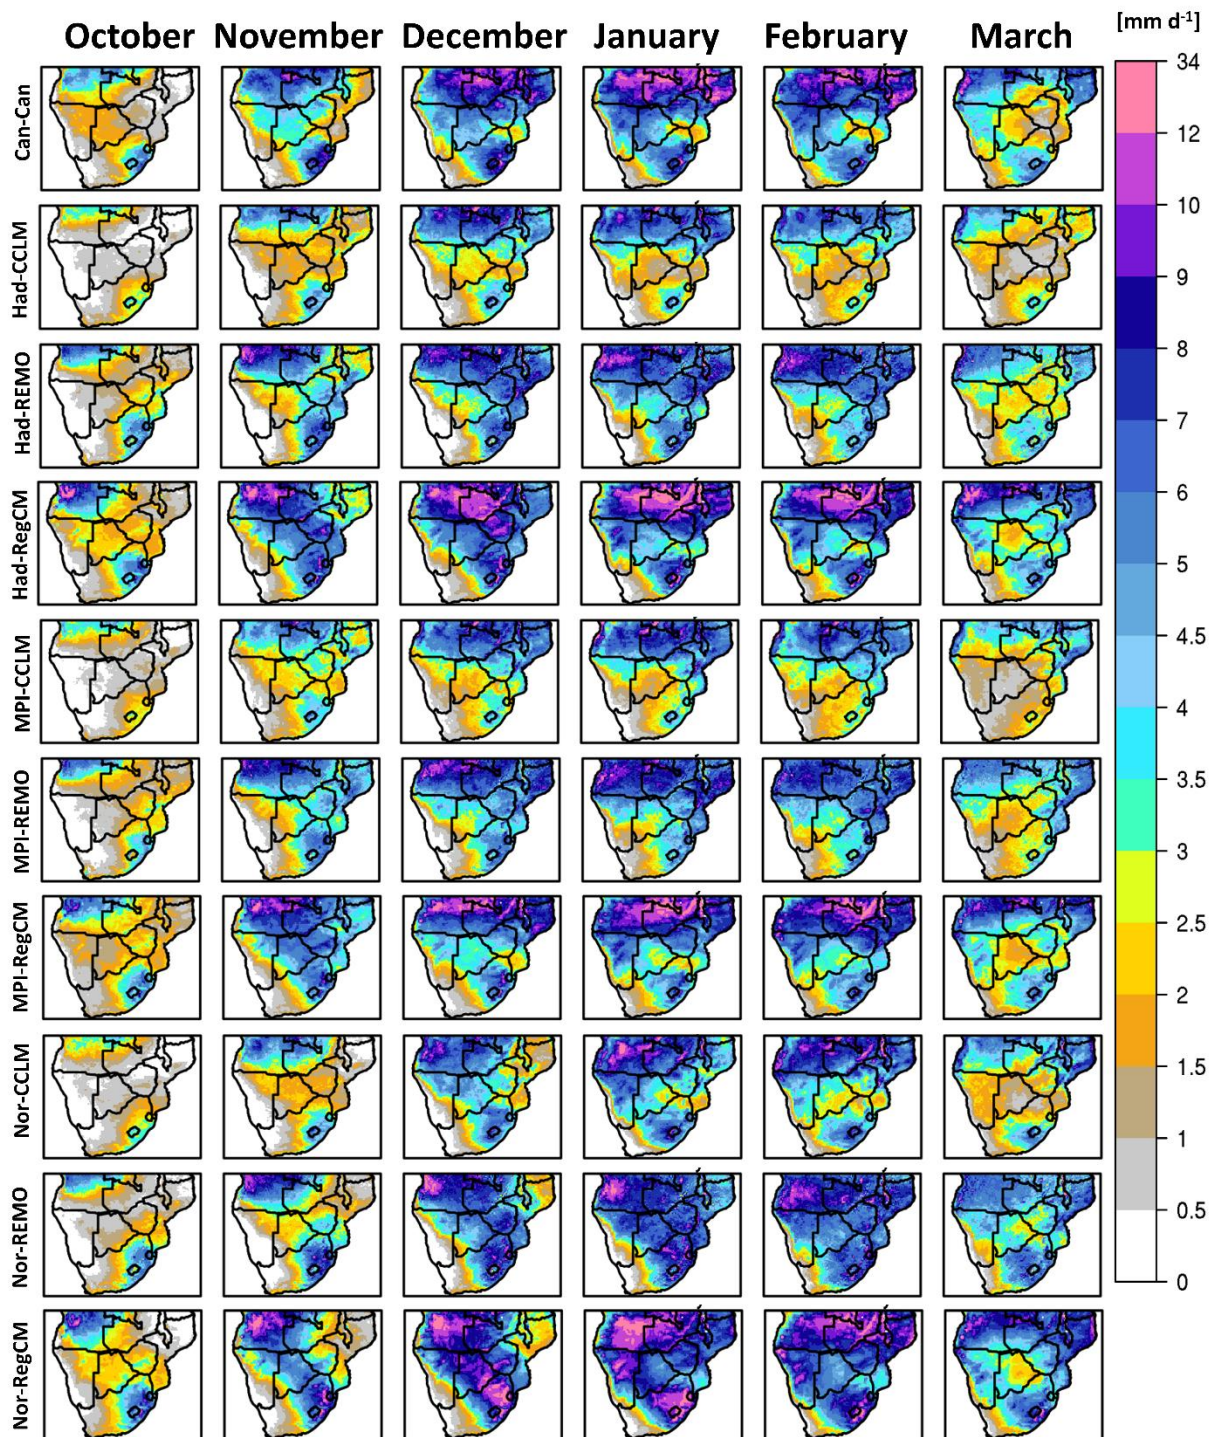

71

72 Figure S8: Monthly precipitation climatologies during the period 1986-2005 in  $\text{mm d}^{-1}$  from the ensemble members  
 73 of the CORDEX-Africa 0.22° simulations (CORDEX0.22).

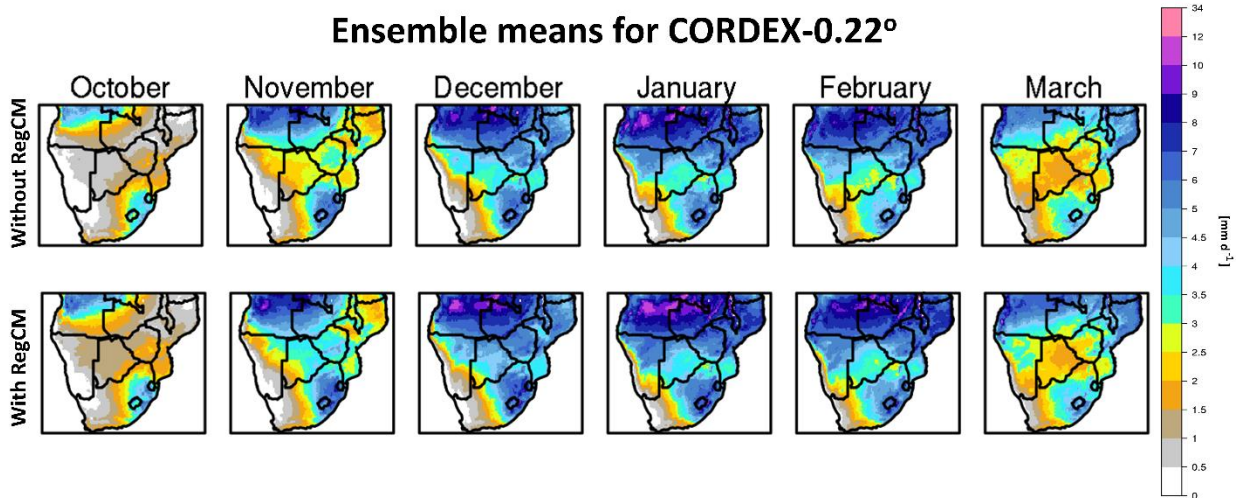

74

75 Figure S9: Ensemble mean of the CORDEX-Africa 0.22° ensemble (CORDEX0.22) by excluding the RegCM4-7  
 76 simulations (upper row) and by including all available simulations (bottom row).

77

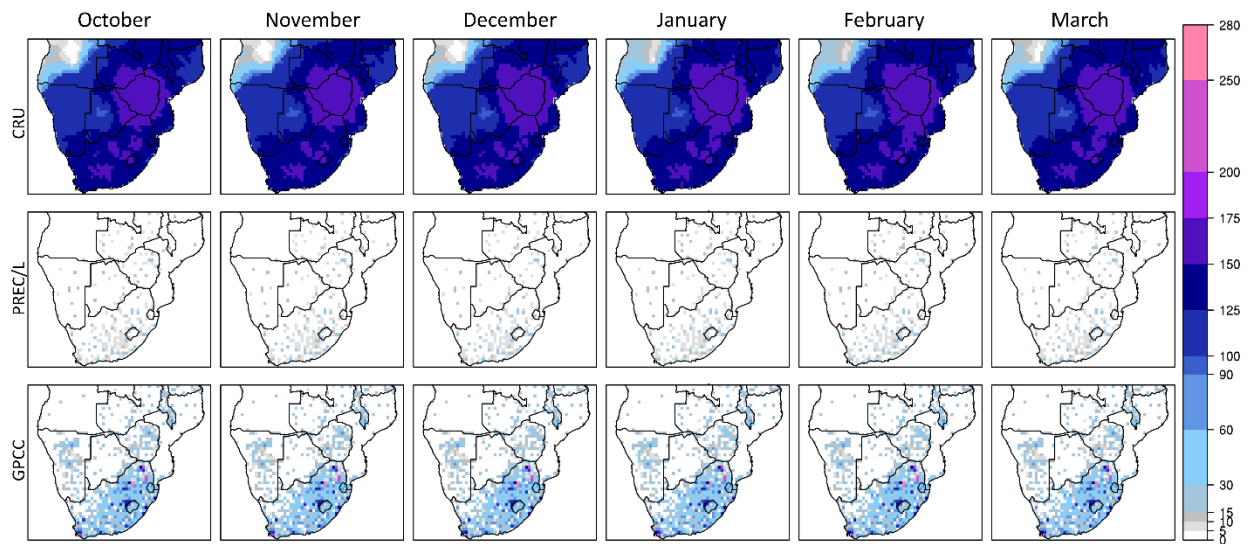

78

79 Figure S10. Total number of reporting stations/rain-gauges for each month during the period 1986-2005, used in the  
 80 interpolation process of each gauge-based product (CRU, PREC/L, GPCC).

81

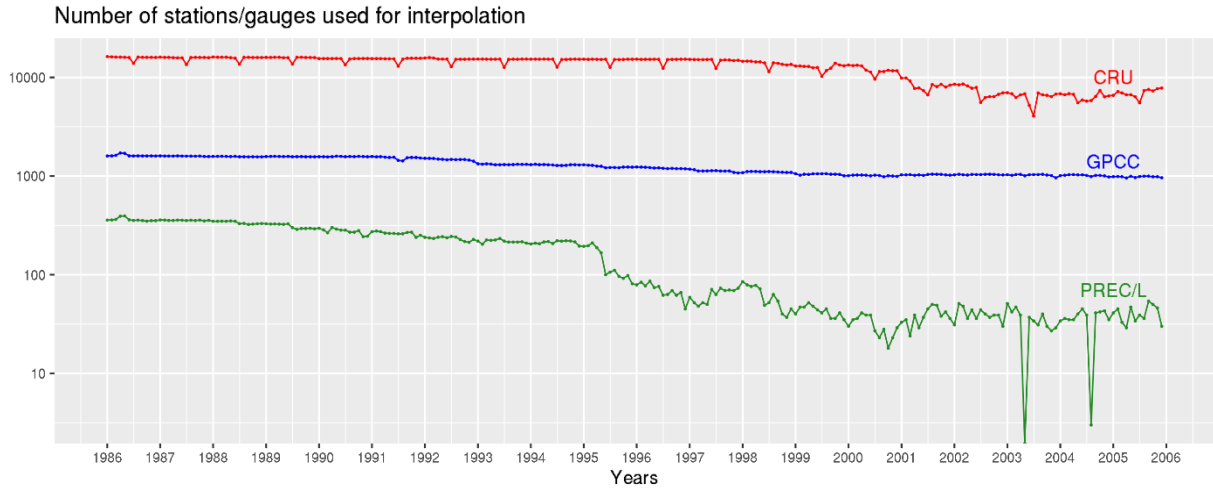

82

83 Figure S11. Timeseries of the number of stations/rain-gauges used in 3 gauge-based products, over the southern Africa  
 84 region (10°E to 42°E and 10°S to 35°S).

85

86

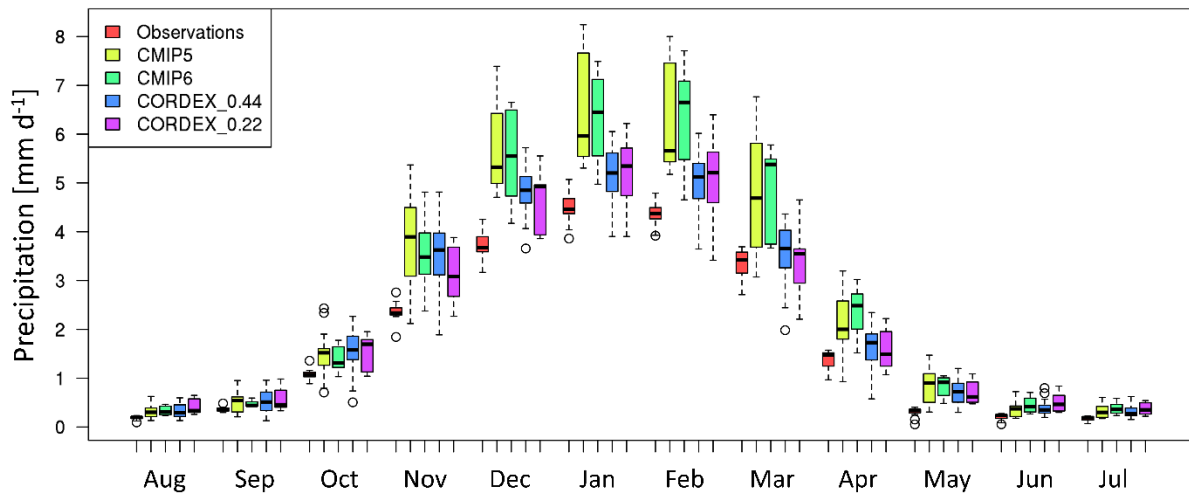

87

88 Figure S12: Annual cycle of monthly precipitation during 1986-2005 for the ensemble of observational data (gauge-  
 89 based, satellite and reanalysis), CMIP5 (Coupled Model Intercomparison Project Phase 5), CMIP6 (Coupled Model  
 90 Intercomparison Project Phase 6), CORDEX0.44 (Coordinated Regional Climate Downscaling Experiment – Africa  
 91 domain with a spatial resolution equal to 0.44° x 0.44°) and CORDEX-0.22° (CORDEX-Africa simulations with a  
 92 spatial resolution equal to 0.22° x 0.22°, excluding the RegCM4-7 simulations from the ensemble). The thick  
 93 horizontal black lines indicate the ensemble median for each month, the box encloses the interquartile range, and the  
 94 tails denote the full ensemble range. Circles represent the outliers for each ensemble. Grid points only are considered.

95

96

97

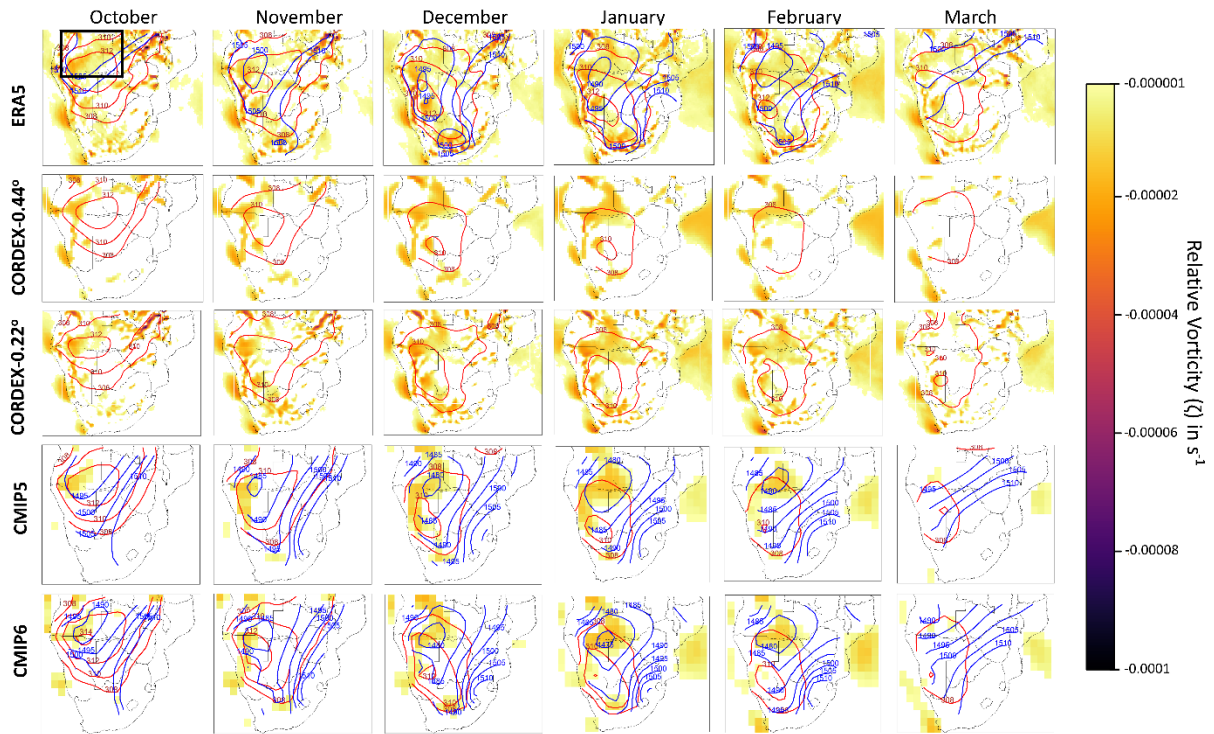

99

100 Figure S13: Monthly climatologies of the Angola Low pressure system during the rainy season for the period 1986-  
 101 2005. Filled contours indicate cyclonic relative vorticity ( $\zeta$ ) for  $\zeta < -0.00001 \text{ s}^{-1}$  over the whole southern Africa region.  
 102 Red lines indicate the isotherms of potential temperature at 850 hPa, having an increment of 2 K. Blue lines indicate  
 103 isoheights of the geopotential height at 850 hPa, having an increment of 5 m. CORDEX0.44/0.22 are not plotted with  
 104 geopotential isoheights, because this variable was not available for CORDEX simulations. From top to bottom: ERA5,  
 105 ensemble mean of CORDEX0.44°, CORDEX0.22°, CMIP5 and CMIP6 simulations. Black box indicates the region  
 106 from 14°E to 25°E and from 11°S to 19°S.

107

108

109

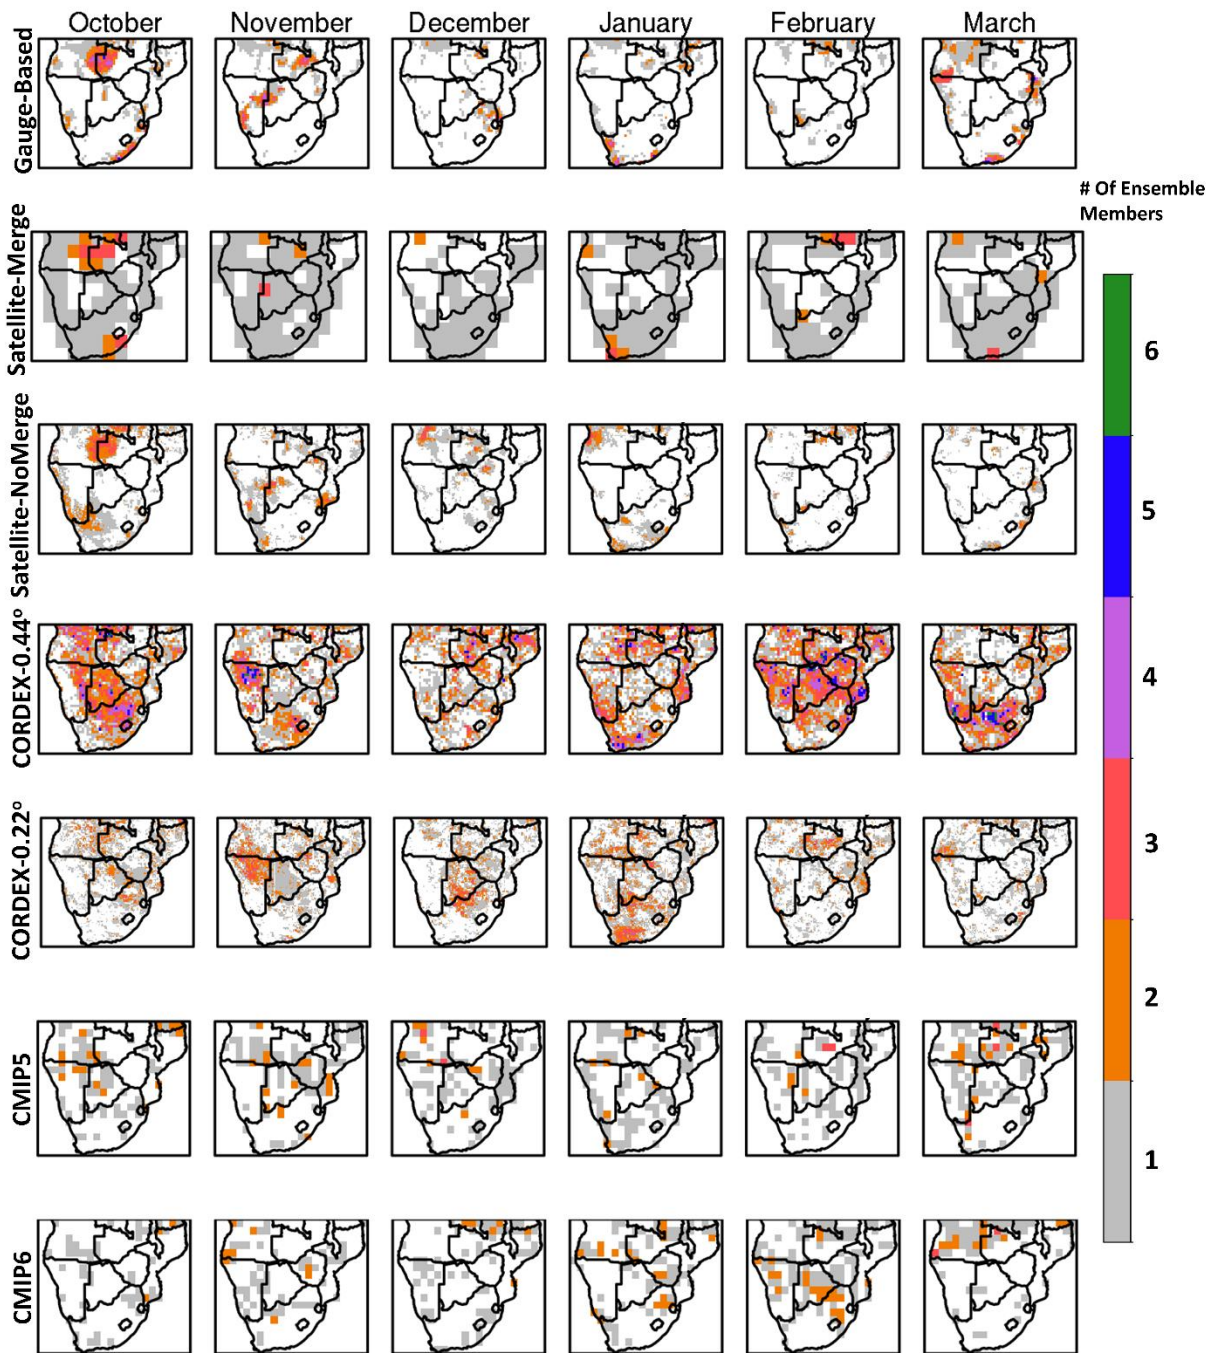

110

111 Figure S14. Number of ensemble members yielding statistically significant results for monthly precipitation trends  
 112 based on the Mann-Kendall test ( $\alpha=0.05$ ).

113

114

Number of ensemble members displaying **increasing** trends

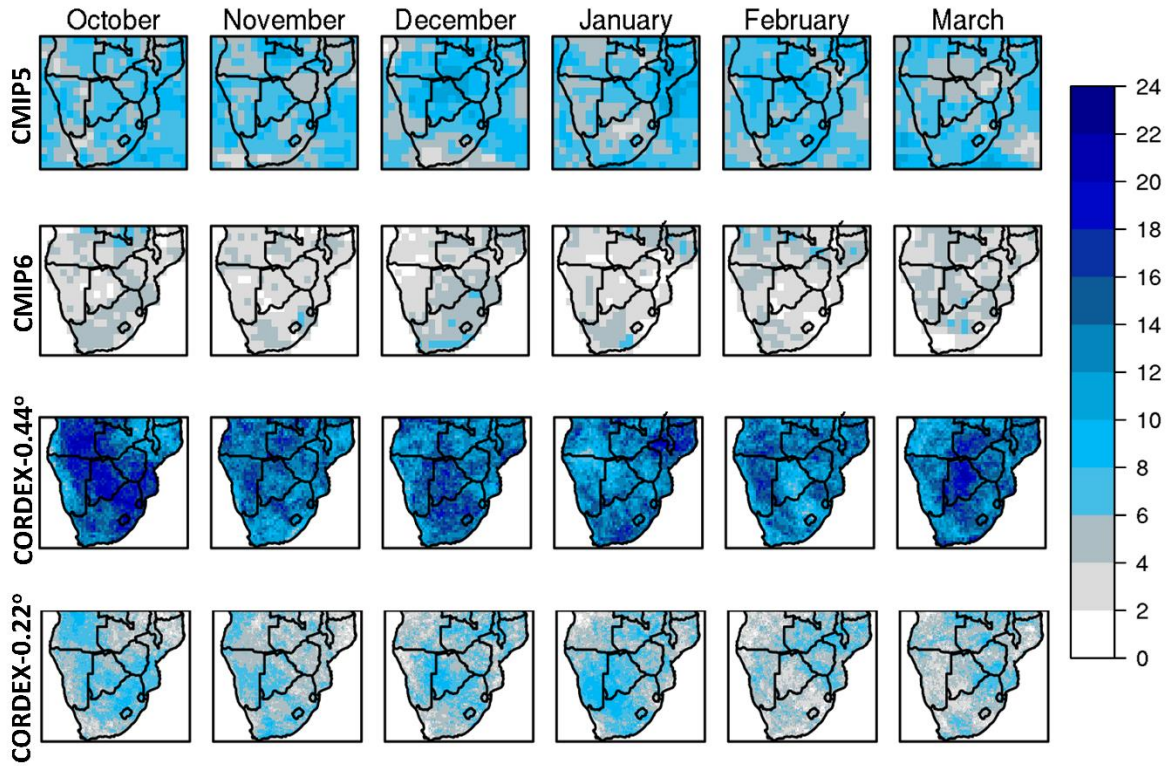

Number of ensemble members displaying **decreasing** trends

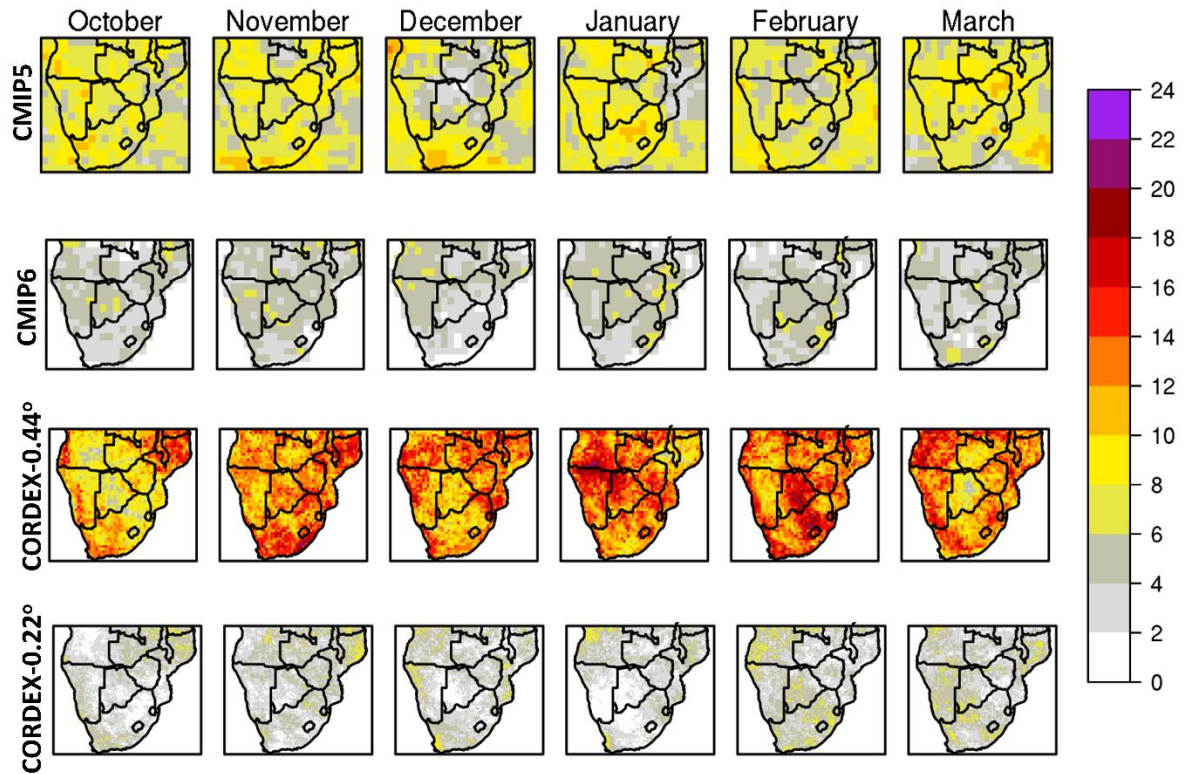

116 Figure S15: Number of ensemble members displaying increasing or decreasing trends for each ensemble.

## 117 References

- 118 Adler, R.F., Gu, G., Huffman, G.J., 2012. Estimating Climatological Bias Errors for the Global Precipitation  
119 Climatology Project (GPCP). *J. Appl. Meteorol. Climatol.* 51, 84–99. <https://doi.org/10.1175/JAMC-D-11->  
120 052.1
- 121 Ashouri, H., Hsu, K.-L., Sorooshian, S., Braithwaite, D.K., Knapp, K.R., Cecil, L.D., Nelson, B.R., Prat, O.P., 2015.  
122 PERSIANN-CDR: Daily Precipitation Climate Data Record from Multisatellite Observations for  
123 Hydrological and Climate Studies. *Bull. Am. Meteorol. Soc.* 96, 69–83. <https://doi.org/10.1175/BAMS-D->  
124 13-00068.1
- 125 Bentsen, M., Bethke, I., Debernard, J.B., Iversen, T., Kirkevåg, A., Seland, Ø., Drange, H., Roelandt, C., Seierstad,  
126 I.A., Hoose, C., Kristjánsson, J.E., 2013. The Norwegian Earth System Model, NorESM1-M – Part 1:  
127 Description and basic evaluation of the physical climate. *Geosci. Model Dev.* 6, 687–720.  
128 <https://doi.org/10.5194/gmd-6-687-2013>
- 129 C3S, 2017. ERA5: Fifth generation of ECMWF atmospheric reanalyses of the global climate.
- 130 CCCma, 2017. Environment and Climate Change Canada - Climate Change - CanESM2 [WWW Document]. URL  
131 <http://www.ec.gc.ca/ccmac-cccma/default.asp?lang=En&xml=1A3B7DF1-99BB-4EC8-B129->  
132 09F83E72D645 (accessed 6.23.20).
- 133 Chen, M., Shi, W., Xie, P., Silva, V.B.S., Kousky, V.E., Higgins, R.W., Janowiak, J.E., 2008. Assessing objective  
134 techniques for gauge-based analyses of global daily precipitation. *J. Geophys. Res. Atmospheres* 113.  
135 <https://doi.org/10.1029/2007JD009132>
- 136 Chen, M., Xie, P., Janowiak, J.E., Arkin, P.A., 2002. Global Land Precipitation: A 50-yr Monthly Analysis Based on  
137 Gauge Observations. *J. Hydrometeorol.* 3, 249–266. <https://doi.org/10.1175/1525->  
138 7541(2002)003<0249:GLPAYM>2.0.CO;2
- 139 Collins, W.J., Bellouin, N., Doutriaux-Boucher, M., Gedney, N., Halloran, P., Hinton, T., Hughes, J., Jones, C.D.,  
140 Joshi, M., Liddicoat, S., Martin, G., O’Connor, F., Rae, J., Senior, C., Sitch, S., Totterdell, I., Wiltshire, A.,  
141 Woodward, S., 2011. Development and evaluation of an Earth-System model – HadGEM2. *Geosci. Model*  
142 *Dev.* 4, 1051–1075. <https://doi.org/10.5194/gmd-4-1051-2011>
- 143 COSMO, 2020. COSMO core documentation [WWW Document]. URL <http://www.cosmo->  
144 [model.org/content/model/documentation/core/default.htm#p1](http://www.cosmo-model.org/content/model/documentation/core/default.htm#p1) (accessed 6.22.20).
- 145 Dufresne, J.-L., Foujols, M.-A., Denvil, S., Caubel, A., Marti, O., Aumont, O., Balkanski, Y., Bekki, S., Bellenger,  
146 H., Benshila, R., Bony, S., Bopp, L., Braconnot, P., Brockmann, P., Cadule, P., Cheruy, F., Codron, F., Cozic,  
147 A., Cugnet, D., de Noblet, N., Duvel, J.-P., Ethé, C., Fairhead, L., Fichefet, T., Flavoni, S., Friedlingstein,  
148 P., Grandpeix, J.-Y., Guez, L., Guilyardi, E., Hauglustaine, D., Hourdin, F., Idelkadi, A., Ghattas, J.,  
149 Joussaume, S., Kageyama, M., Krinner, G., Labetoulle, S., Lahellec, A., Lefebvre, M.-P., Lefevre, F., Levy,  
150 C., Li, Z.X., Lloyd, J., Lott, F., Madec, G., Mancip, M., Marchand, M., Masson, S., Meurdesoif, Y., Mignot,  
151 J., Musat, I., Parouty, S., Polcher, J., Rio, C., Schulz, M., Swingedouw, D., Szopa, S., Talandier, C., Terray,  
152 P., Viovy, N., Vuichard, N., 2013. Climate change projections using the IPSL-CM5 Earth System Model:  
153 from CMIP3 to CMIP5. *Clim. Dyn.* 40, 2123–2165. <https://doi.org/10.1007/s00382-012-1636-1>
- 154 Dunne, J.P., John, J.G., Adcroft, A.J., Griffies, S.M., Hallberg, R.W., Shevliakova, E., Stouffer, R.J., Cooke, W.,  
155 Dunne, K.A., Harrison, M.J., Krasting, J.P., Malyshev, S.L., Milly, P.C.D., Phillipps, P.J., Sentman, L.T.,  
156 Samuels, B.L., Spelman, M.J., Winton, M., Wittenberg, A.T., Zadeh, N., 2012. GFDL’s ESM2 Global  
157 Coupled Climate–Carbon Earth System Models. Part I: Physical Formulation and Baseline Simulation  
158 Characteristics. *J. Clim.* 25, 6646–6665. <https://doi.org/10.1175/JCLI-D-11-00560.1>
- 159 Funk, C., Peterson, P., Landsfeld, M., Pedreros, D., Verdin, J., Shukla, S., Husak, G., Rowland, J., Harrison, L., Hoell,  
160 A., Michaelsen, J., 2015. The climate hazards infrared precipitation with stations—a new environmental  
161 record for monitoring extremes. *Sci. Data* 2, 150066. <https://doi.org/10.1038/sdata.2015.66>
- 162 Giorgetta, M.A., Jungclaus, J., Reick, C.H., Legutke, S., Bader, J., Böttinger, M., Brovkin, V., Crueger, T., Esch, M.,  
163 Fieg, K., Glushak, K., Gayler, V., Haak, H., Hollweg, H.-D., Ilyina, T., Kinne, S., Kornblueh, L., Matei, D.,  
164 Mauritsen, T., Mikolajewicz, U., Mueller, W., Notz, D., Pithan, F., Raddatz, T., Rast, S., Redler, R.,  
165 Roeckner, E., Schmidt, H., Schnur, R., Segschneider, J., Six, K.D., Stockhause, M., Timmreck, C., Wegner,  
166 J., Widmann, H., Wieners, K.-H., Claussen, M., Marotzke, J., Stevens, B., 2013. Climate and carbon cycle  
167 changes from 1850 to 2100 in MPI-ESM simulations for the Coupled Model Intercomparison Project phase  
168 5. *J. Adv. Model. Earth Syst.* 5, 572–597. <https://doi.org/10.1002/jame.20038>



169 Harris, I., Jones, P.D., Osborn, T.J., Lister, D.H., 2014. Updated high-resolution grids of monthly climatic  
170 observations – the CRU TS3.10 Dataset. *Int. J. Climatol.* 34, 623–642. <https://doi.org/10.1002/joc.3711>

171 Hazeleger, W., Severijns, C., Semmler, T., Ștefănescu, S., Yang, S., Wang, X., Wyser, K., Dutra, E., Baldasano, J.M.,  
172 Bintanja, R., Bougeault, P., Caballero, R., Ekman, A.M.L., Christensen, J.H., van den Hurk, B., Jimenez, P.,  
173 Jones, C., Kållberg, P., Koenigk, T., McGrath, R., Miranda, P., van Noije, T., Palmer, T., Parodi, J.A.,  
174 Schmith, T., Selten, F., Storelvmo, T., Sterl, A., Tapamo, H., Vancoppenolle, M., Viterbo, P., Willén, U.,  
175 2010. EC-EarthA Seamless Earth-System Prediction Approach in Action. *Bull. Am. Meteorol. Soc.* 91,  
176 1357–1364. <https://doi.org/10.1175/2010BAMS2877.1>

177 Held, I.M., Guo, H., Adcroft, A., Dunne, J.P., Horowitz, L.W., Krasting, J., Shevliakova, E., Winton, M., Zhao, M.,  
178 Bushuk, M., Wittenberg, A.T., Wyman, B., Xiang, B., Zhang, R., Anderson, W., Balaji, V., Donner, L.,  
179 Dunne, K., Durachta, J., Gauthier, P.P.G., Ginoux, P., Golaz, J.-C., Griffies, S.M., Hallberg, R., Harris, L.,  
180 Harrison, M., Hurlin, W., John, J., Lin, P., Lin, S.-J., Malyshev, S., Menzel, R., Milly, P.C.D., Ming, Y.,  
181 Naik, V., Paynter, D., Paulot, F., Rammawamy, V., Reichl, B., Robinson, T., Rosati, A., Seman, C., Silvers,  
182 L.G., Underwood, S., Zadeh, N., 2019. Structure and Performance of GFDL’s CM4.0 Climate Model. *J. Adv.*  
183 *Model. Earth Syst.* 11, 3691–3727. <https://doi.org/10.1029/2019MS001829>

184 Hersbach, H., Bell, B., Berrisford, P., Hirahara, S., Horányi, A., Muñoz-Sabater, J., Nicolas, J., Peubey, C., Radu, R.,  
185 Schepers, D., Simmons, A., Soci, C., Abdalla, S., Abellan, X., Balsamo, G., Bechtold, P., Biavati, G., Bidlot,  
186 J., Bonavita, M., Chiara, G.D., Dahlgren, P., Dee, D., Diamantakis, M., Dragani, R., Flemming, J., Forbes,  
187 R., Fuentes, M., Geer, A., Haimberger, L., Healy, S., Hogan, R.J., Hólm, E., Janisková, M., Keeley, S.,  
188 Laloyaux, P., Lopez, P., Lupu, C., Radnoti, G., Rosnay, P. de, Rozum, I., Vamborg, F., Villaume, S., Thépaut,  
189 J.-N., 2020. The ERA5 global reanalysis. *Q. J. R. Meteorol. Soc.* 146, 1999–2049.  
190 <https://doi.org/10.1002/qj.3803>

191 Jacob, D., Elizalde, A., Haensler, A., Hagemann, S., Kumar, P., Podzun, R., Rechied, D., Remedio, A.R., Saeed, F.,  
192 Sieck, K., Teichmann, C., Wilhelm, C., 2012. Assessing the Transferability of the Regional Climate Model  
193 REMO to Different COordinated Regional Climate Downscaling EXperiment (CORDEX) Regions.  
194 *Atmosphere* 3, 181–199. <https://doi.org/10.3390/atmos3010181>

195 Jeffrey, S., Rotstayn, L.D., Collier, M., Dravitzki, S.M., Hamalainen, C., Moeseneder, C., Wong, K., Syktus, J., 2013.  
196 Australia’s CMIP 5 submission using the CSIRO-Mk 3.6 model.

197 Maidment, R.I., Grimes, D., Black, E., Tarnavsky, E., Young, M., Greatrex, H., Allan, R.P., Stein, T., Nkonde, E.,  
198 Senkunda, S., Alcántara, E.M.U., 2017. A new, long-term daily satellite-based rainfall dataset for operational  
199 monitoring in Africa. *Sci. Data* 4, 170063. <https://doi.org/10.1038/sdata.2017.63>

200 Massonnet, F., Ménégoz, M., Acosta, M., Yepes-Arbós, X., Exarchou, E., Doblas-Reyes, F.J., 2020. Replicability of  
201 the EC-Earth3 Earth system model under a change in computing environment. *Geosci. Model Dev.* 13, 1165–  
202 1178. <https://doi.org/10.5194/gmd-13-1165-2020>

203 Mauritsen, T., Bader, J., Becker, T., Behrens, J., Bittner, M., Brokopf, R., Brovkin, V., Claussen, M., Crueger, T.,  
204 Esch, M., Fast, I., Fiedler, S., Fläschner, D., Gayler, V., Giorgetta, M., Goll, D.S., Haak, H., Hagemann, S.,  
205 Hedemann, C., Hohenegger, C., Ilyina, T., Jahns, T., Jimenez-de-la-Cuesta, D., Jungclaus, J., Kleinen, T.,  
206 Kloster, S., Kracher, D., Kinne, S., Kleberg, D., Lasslop, G., Kornbluh, L., Marotzke, J., Matei, D., Meraner,  
207 K., Mikolajewicz, U., Modali, K., Möbis, B., Müller, W.A., Nabel, J.E.M.S., Nam, C.C.W., Notz, D.,  
208 Nyawira, S.-S., Paulsen, H., Peters, K., Pincus, R., Pohlmann, H., Pongratz, J., Popp, M., Raddatz, T.J., Rast,  
209 S., Redler, R., Reick, C.H., Rohrschneider, T., Schemann, V., Schmidt, H., Schnur, R., Schulzweida, U., Six,  
210 K.D., Stein, L., Stemmler, I., Stevens, B., Storch, J.-S. von, Tian, F., Voigt, A., Vrese, P., Wieners, K.-H.,  
211 Wilkenskjaeld, S., Winkler, A., Roeckner, E., 2019. Developments in the MPI-M Earth System Model version  
212 1.2 (MPI-ESM1.2) and Its Response to Increasing CO<sub>2</sub>. *J. Adv. Model. Earth Syst.* 11, 998–1038.  
213 <https://doi.org/10.1029/2018MS001400>

214 Novella, N.S., Thiaw, W.M., 2013. African Rainfall Climatology Version 2 for Famine Early Warning Systems. *J.*  
215 *Appl. Meteorol. Climatol.* 52, 588–606. <https://doi.org/10.1175/JAMC-D-11-0238.1>

216 Samuelsson, P., Gollvik, S., Jansson, C., Kupiainen, M., Kourzeneva, E., van de Berg, W.J., 2015. The surface  
217 processes of the Rossby Centre regional atmospheric climate model (RCA4). [WWW Document].  
218 [https://www.smhi.se/polopoly\\_fs/1.89803!/Menu/general/extGroup/attachmentColHold/mainCol1/file/mete](https://www.smhi.se/polopoly_fs/1.89803!/Menu/general/extGroup/attachmentColHold/mainCol1/file/mete)  
219 [oroologi\\_157.pdf](https://www.smhi.se/polopoly_fs/1.89803!/Menu/general/extGroup/attachmentColHold/mainCol1/file/mete). URL  
220 [https://www.smhi.se/polopoly\\_fs/1.89803!/Menu/general/extGroup/attachmentColHold/mainCol1/file/mete](https://www.smhi.se/polopoly_fs/1.89803!/Menu/general/extGroup/attachmentColHold/mainCol1/file/mete)  
221 [oroologi\\_157.pdf](https://www.smhi.se/polopoly_fs/1.89803!/Menu/general/extGroup/attachmentColHold/mainCol1/file/mete) (accessed 12.9.19).

222 Schneider, U., Becker, A., Finger, P., Meyer-Christoffer, A., Rudolf, B., Ziese, M., 2015. GPCC Full Data Reanalysis  
223 Version 7.0 at 0.5°: Monthly Land-Surface Precipitation from Rain-Gauges built on GTS-based and Historic  
224 Data.

225 Scinocca, J.F., Kharin, V.V., Jiao, Y., Qian, M.W., Lazare, M., Solheim, L., Flato, G.M., Biner, S., Desgagne, M.,  
226 Dugas, B., 2016. Coordinated Global and Regional Climate Modeling. *J. Clim.* 29, 17–35.  
227 <https://doi.org/10.1175/JCLI-D-15-0161.1>

228 Scinocca, J.F., Kharin, V.V., Jiao, Y., Qian, M.W., Lazare, M., Solheim, L., Flato, G.M., Biner, S., Desgagne, M.,  
229 Dugas, B., 2015. Coordinated Global and Regional Climate Modeling. *J. Clim.* 29, 17–35.  
230 <https://doi.org/10.1175/JCLI-D-15-0161.1>

231 Seland, Ø., Bentsen, M., Olivié, D., Toniazzo, T., Gjermdunden, A., Graff, L.S., Debernard, J.B., Gupta, A.K., He,  
232 Y.-C., Kirkevåg, A., Schwinger, J., Tjiputra, J., Aas, K.S., Bethke, I., Fan, Y., Griesfeller, J., Grini, A., Guo,  
233 C., Ilicak, M., Karset, I.H.H., Landgren, O., Liakka, J., Moseid, K.O., Nummelin, A., Spensberger, C., Tang,  
234 H., Zhang, Z., Heinze, C., Iversen, T., Schulz, M., 2020. Overview of the Norwegian Earth System Model  
235 (NorESM2) and key climate response of CMIP6 DECK, historical, and scenario simulations. *Geosci. Model*  
236 *Dev.* 13, 6165–6200. <https://doi.org/10.5194/gmd-13-6165-2020>

237 Swart, N.C., Cole, J.N.S., Kharin, V.V., Lazare, M., Scinocca, J.F., Gillett, N.P., Anstey, J., Arora, V., Christian, J.R.,  
238 Hanna, S., Jiao, Y., Lee, W.G., Majaess, F., Saenko, O.A., Seiler, C., Seinen, C., Shao, A., Sigmond, M.,  
239 Solheim, L., von Salzen, K., Yang, D., Winter, B., 2019. The Canadian Earth System Model version 5  
240 (CanESM5.0.3). *Geosci. Model Dev.* 12, 4823–4873. <https://doi.org/10.5194/gmd-12-4823-2019>

241 Tarnavsky, E., Grimes, D., Maidment, R., Black, E., Allan, R.P., Stringer, M., Chadwick, R., Kayitakire, F., 2014.  
242 Extension of the TAMSAT Satellite-Based Rainfall Monitoring over Africa and from 1983 to Present. *J.*  
243 *Appl. Meteorol. Climatol.* 53, 2805–2822. <https://doi.org/10.1175/JAMC-D-14-0016.1>

244 Tatebe, H., Ogura, T., Nitta, T., Komuro, Y., Ogochi, K., Takemura, T., Sudo, K., Sekiguchi, M., Abe, M., Saito, F.,  
245 Chikira, M., Watanabe, S., Mori, M., Hirota, N., Kawatani, Y., Mochizuki, T., Yoshimura, K., Takata, K.,  
246 O’ishi, R., Yamazaki, D., Suzuki, T., Kurogi, M., Kataoka, T., Watanabe, M., Kimoto, M., 2019. Description  
247 and basic evaluation of simulated mean state, internal variability, and climate sensitivity in MIROC6. *Geosci.*  
248 *Model Dev.* 12, 2727–2765. <https://doi.org/10.5194/gmd-12-2727-2019>

249 van Meijgaard, E., van Ulft, L.H., van de Berg, W.J., Bosveld, F.C., van den Hurk, B.J.J.M., Lenderink, G., Siebesma,  
250 A.P., 2008. The KNMI regional atmospheric climate model RACMO version 2.1 (TR - 302). KNMI, The  
251 Netherlands.

252 Voltaire, A., Saint-Martin, D., Sénési, S., Decharme, B., Alias, A., Chevallier, M., Colin, J., Guérémy, J.-F., Michou,  
253 M., Moine, M.-P., Nabat, P., Roehrig, R., Méliá, D.S. y, Séférian, R., Valcke, S., Beau, I., Belamari, S.,  
254 Berthet, S., Cassou, C., Cattiaux, J., Deshayes, J., Douville, H., Ethé, C., Franchistéguy, L., Geoffroy, O.,  
255 Lévy, C., Madec, G., Meurdesoif, Y., Msadek, R., Ribes, A., Sanchez-Gomez, E., Terray, L., Waldman, R.,  
256 2019. Evaluation of CMIP6 DECK Experiments With CNRM-CM6-1. *J. Adv. Model. Earth Syst.* 11, 2177–  
257 2213. <https://doi.org/10.1029/2019MS001683>

258 Voltaire, A., Sanchez-Gomez, E., Salas y Méliá, D., Decharme, B., Cassou, C., Sénési, S., Valcke, S., Beau, I., Alias,  
259 A., Chevallier, M., Déqué, M., Deshayes, J., Douville, H., Fernandez, E., Madec, G., Maisonnave, E., Moine,  
260 M.-P., Planton, S., Saint-Martin, D., Szopa, S., Tyteca, S., Alkama, R., Belamari, S., Braun, A., Coquart, L.,  
261 Chauvin, F., 2013. The CNRM-CM5.1 global climate model: description and basic evaluation. *Clim. Dyn.*  
262 40, 2091–2121. <https://doi.org/10.1007/s00382-011-1259-y>

263 Watanabe, M., Suzuki, T., O’ishi, R., Komuro, Y., Watanabe, S., Emori, S., Takemura, T., Chikira, M., Ogura, T.,  
264 Sekiguchi, M., Takata, K., Yamazaki, D., Yokohata, T., Nozawa, T., Hasumi, H., Tatebe, H., Kimoto, M.,  
265 2010. Improved Climate Simulation by MIROC5: Mean States, Variability, and Climate Sensitivity. *J. Clim.*  
266 23, 6312–6335. <https://doi.org/10.1175/2010JCLI3679.1>

267 Willmott, C.J., Matsuura, K., 1995. Smart Interpolation of Annually Averaged Air Temperature in the United States.  
268 *J. Appl. Meteorol.* 34, 2577–2586. [https://doi.org/10.1175/1520-0450\(1995\)034<2577:SIOAAA>2.0.CO;2](https://doi.org/10.1175/1520-0450(1995)034<2577:SIOAAA>2.0.CO;2)

269 Xie, P., Arkin, P.A., 1997. Global Precipitation: A 17-Year Monthly Analysis Based on Gauge Observations, Satellite  
270 Estimates, and Numerical Model Outputs. *Bull. Am. Meteorol. Soc.* 78, 2539–2558.  
271 [https://doi.org/10.1175/1520-0477\(1997\)078<2539:GPAYMA>2.0.CO;2](https://doi.org/10.1175/1520-0477(1997)078<2539:GPAYMA>2.0.CO;2)

272
